# Supplementary material
Source: Springer Nature journal article supplement (https://www.springermedizin.de/resource/supplementary/13058_2013_3560_MOESM9_ESM.pdf/9704154)

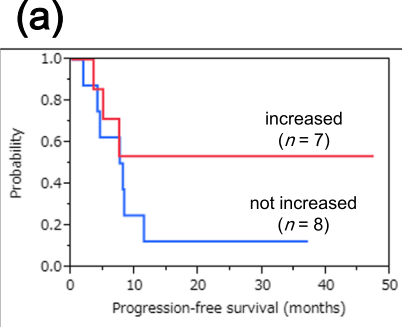

mrTNBC

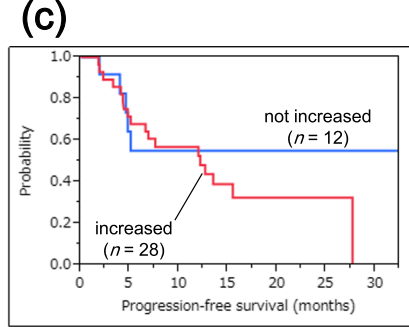

Lum-HER2(-)

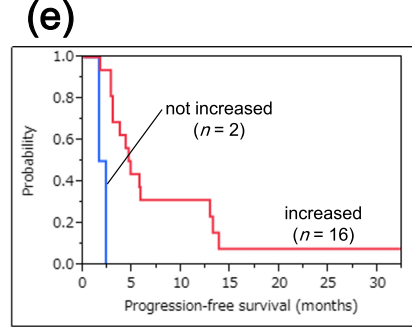

HER2(+)

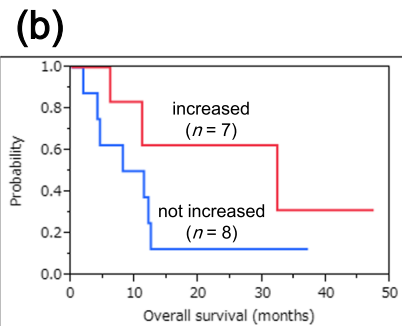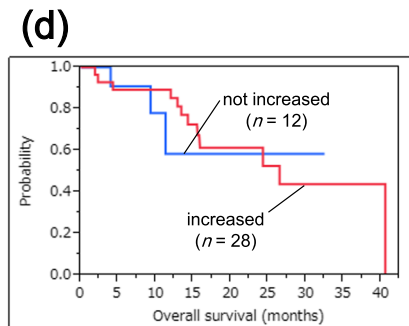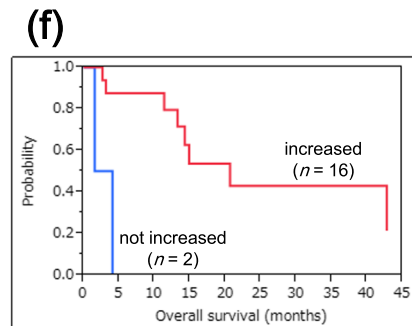

Supplement: MOESM9 [file 9704154]
